# Supplementary material for: BLAT-Based Comparative Analysis for Transposable Elements: BLATCAT
Source: Hindawi journal article supplement (doi:10.1155/2014/730814), 2014-01-01
Supplement: f1 [file 730814.f1.pdf]

Genomes

Genome Browser

Tools

Mirrors

Downloads

My Data

About Us

Help

Human BLAT Search

BLAT Search Genome

Genome: 

Human

 Assembly: 

May 2004 (NCBI35/hg17)

Output:

Output type: 

hyperlink

Blat

Table Browser

Variant Annotation Integrator

Gene Sorter

Genome Graphs

In-Silico PCR

LiftOver

VisiGene

Other Utilities

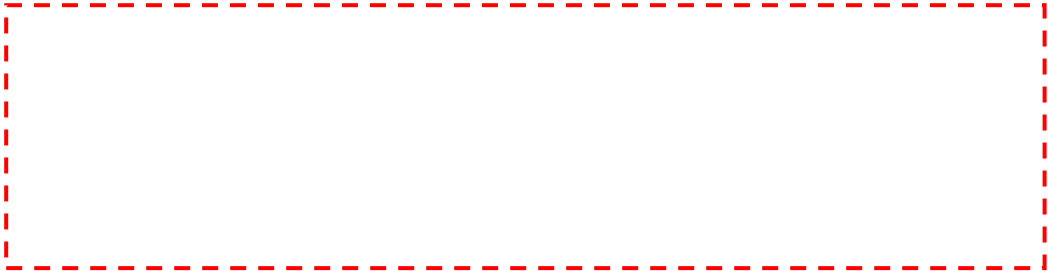

BLAT Search Results

| ACTIONS                                         | QUERY    | SCORE | START | END | QSIZE | IDENTITY | CHRO | STRAND | START     | END       | SPAN |
|-------------------------------------------------|----------|-------|-------|-----|-------|----------|------|--------|-----------|-----------|------|
| <a href="#">browser</a> <a href="#">details</a> | hg17_dna | 533   | 1     | 873 | 873   | 94.8%    | 10   | +      | 81315688  | 81316242  | 555  |
| <a href="#">browser</a> <a href="#">details</a> | hg17_dna | 287   | 300   | 604 | 873   | 97.1%    | 5    | -      | 101791646 | 101791950 | 305  |
| <a href="#">browser</a> <a href="#">details</a> | hg17_dna | 286   | 282   | 594 | 873   | 96.5%    | 15   | +      | 83651541  | 83651862  | 322  |
| <a href="#">browser</a> <a href="#">details</a> | hg17_dna | 281   | 302   | 600 | 873   | 97.0%    | 7    | -      | 132943638 | 132943936 | 299  |
| <a href="#">browser</a> <a href="#">details</a> | hg17_dna | 281   | 299   | 602 | 873   | 96.4%    | 4    | -      | 42153003  | 42153307  | 305  |
| <a href="#">browser</a> <a href="#">details</a> | hg17_dna | 279   | 289   | 602 | 873   | 95.2%    | 6    | +      | 49946897  | 49947210  | 314  |
| <a href="#">browser</a> <a href="#">details</a> | hg17_dna | 277   | 284   | 602 | 873   | 93.7%    | 9    | +      | 125798716 | 125799038 | 323  |
| <a href="#">browser</a> <a href="#">details</a> | hg17_dna | 277   | 303   | 598 | 873   | 97.0%    | 5    | +      | 155209819 | 155210131 | 313  |

v.

Genome: Chimp Assembly: Feb. 2011 (CSAC 2.1.4/panTro4) Query type: BLAT's guess Sort output: query,score Output type: hyperlink

>hg17\_dna range=chr10:83728344-83729216 5'pad=0 3'pad=0 strand=+  
repeatMasking=none  
AAGAAACAAATAATAGGAAGATAAAGTTAGGTATTGTCATCAGAGCATTAA  
ACACAGTGATCTTATTTTCGTAAACTCTTAATATCATATATATATATT  
TGCATCTTTCTTTTCTTTCTTTTGTGTTTATAGAGATAGGGTCTTGCTGT  
GTTGCCCTAGGTTTGTCTCAAAGTCTGGCCTCAAAGTATCCTCTTGCCCTC  
AGTCTCCAAAAACATTGGGATTATAGGTATGAGCCACCATGCTGGCCCA  
GCATCTTATGTTTGTAGCATCTAGCCATAATGTATTTTTAAAAATTTCC  
TGGCCGGGCGTGGTGGCTCATGCCTGTAATCCAGCACCTTGGGAGGCCG  
AGGTGGGCGGATCACAAGGTCAAGAGATCAAGACCATCCTGGCCAAACATG  
ATGAAACCCCGTCTCTATTAAAAAGTACAAAAATTAGCTGGGCGTAGTGGC  
GCACGCCCTGTAGTCCAGCTACTTGGGAGGCTGAGGCAGGAGAATCGCTT  
GAACCTGGGAGGCAGAGGTTGCACTGAGCCGGGATTGTGCCACTGCACCT  
CAGCCTGGCGCAGAGGCGGGACTCCGCTCTCAAAAAAATTTTTAAAAA

submit I'm feeling lucky clear

vi.

vii.

Alignment of hg17\_dna

Alignment of hg17\_dna and chr10:81315688-81316242

[hg17\\_dna](#)  
[Chimp: chr10](#)  
[Block1](#)  
[together](#)

Click on links in the frame to the left to navigate through the alignment. Matching bases in cDNA

cDNA hg17\_dna

|                            |                            |                            |                            |                             |     |
|----------------------------|----------------------------|----------------------------|----------------------------|-----------------------------|-----|
| <a href="#">AAGAAACAAA</a> | <a href="#">TAATAGGAAG</a> | <a href="#">ATAAAGTTAG</a> | <a href="#">GTATTGTCAT</a> | <a href="#">CAGAGCATTAA</a> | 50  |
| <a href="#">ACACAGTGAT</a> | <a href="#">CTTATTTTCG</a> | <a href="#">TAAACTCTTA</a> | <a href="#">ATATCATATA</a> | <a href="#">TATATATATT</a>  | 100 |
| <a href="#">TGCATCTTTC</a> | <a href="#">TTTTTCTTTT</a> | <a href="#">CTTTCTTTT</a>  | <a href="#">TAGAGATAGG</a> | <a href="#">GTCTTGCTGT</a>  | 150 |
| <a href="#">GTGCGCTAGG</a> | <a href="#">TTTGTCTCAA</a> | <a href="#">ACTGCTGGCC</a> | <a href="#">TCAAGTGATC</a> | <a href="#">CTCTTGCCCTC</a> | 200 |
| <a href="#">AGTCTCCAAA</a> | <a href="#">AACATTGGGA</a> | <a href="#">TTATAGGTAT</a> | <a href="#">GAGCCACCAT</a> | <a href="#">GCGTGGCCCA</a>  | 250 |
| <a href="#">GCATCTTATG</a> | <a href="#">TTTTGTAGCA</a> | <a href="#">TCTAGCCATA</a> | <a href="#">ATGTATTTTT</a> | <a href="#">AAAAATTTTC</a>  | 300 |
| <a href="#">TGGCGGGGGG</a> | <a href="#">TGGTGGCTCA</a> | <a href="#">TGCCTGTAAT</a> | <a href="#">CCAGCACCTT</a> | <a href="#">TGGGAGGCCG</a>  | 350 |
| <a href="#">AGGTGGGCGG</a> | <a href="#">ATCACAAGGT</a> | <a href="#">CAAGAGATCA</a> | <a href="#">AGACCATCCT</a> | <a href="#">GGCCAAACATG</a> | 400 |
| <a href="#">ATGAAACCCG</a> | <a href="#">GTCTCTATT</a>  | <a href="#">AAAAAGTAC</a>  | <a href="#">AAAAATTAG</a>  | <a href="#">CTGGGCGTAG</a>  | 450 |
| <a href="#">GCACGCCCTG</a> | <a href="#">TAGTCCAGCT</a> | <a href="#">ACTTGGGAGG</a> | <a href="#">CTGAGGCAGG</a> | <a href="#">AGAATCGCTT</a>  | 500 |
| <a href="#">GAACCTGGGA</a> | <a href="#">GCAGGTTTGC</a> | <a href="#">AGTCTGAGCC</a> | <a href="#">GGGATTGTGC</a> | <a href="#">CAGTGCACCT</a>  | 550 |
| <a href="#">CAGCCTGGCG</a> | <a href="#">CAGAGGTTGC</a> | <a href="#">AGTCTGAGCC</a> | <a href="#">GGGATTGTGC</a> | <a href="#">CAGTGCACCT</a>  | 600 |
| <a href="#">AAAAATTTTC</a> | <a href="#">TTTTGTAGCA</a> | <a href="#">TCTAGCCATA</a> | <a href="#">ATGTATTTTT</a> | <a href="#">AAAAATTTTC</a>  | 650 |
| <a href="#">ATGTTATCTC</a> | <a href="#">TGATTTCTCT</a> | <a href="#">CACAGAGTCT</a> | <a href="#">CTATGGGAAA</a> | <a href="#">TATTTGTAGG</a>  | 700 |
| <a href="#">GTTATGGCTT</a> | <a href="#">CCACCTTAAC</a> | <a href="#">AATAATATAA</a> | <a href="#">CATAAAAAGA</a> | <a href="#">AATTCTAATA</a>  | 750 |
| <a href="#">TCTTGCTCAT</a> | <a href="#">ATCTAATGGG</a> | <a href="#">AGCATTTTTG</a> | <a href="#">GGAGGCATTG</a> | <a href="#">TGCACACATT</a>  | 800 |
| <a href="#">GCTAGAGAGC</a> | <a href="#">TATGAAGGAA</a> | <a href="#">CTGTTTCAAA</a> | <a href="#">TGAAGAGAAA</a> | <a href="#">TGCAAGGCTA</a>  | 850 |
| <a href="#">GACAGTATGA</a> | <a href="#">AATGTATCTT</a> | <a href="#">GGT</a>        |                            |                             |     |

viii.

ix.

>Human cacagctctgacgttgggggactgggacccctcttccagctgccgtgttttggcaggaactctgagaatgcttgaactaaaaactggcattttggatctTTACGTAGTGGTATTTCOAAGTAAGAGGAATAGAGCATACTTTATTTAACAACTTTG.  
>Chimp cacagctctgacgttgggggactgggacccctcttccagctgccgtgttttggcaggaactctgagaatgcttgaactaaaaactggcattttggatctTTATGTAGTGGTATTTCOAAGTAAGAGGAATAGAGCATACTTTATTTAACAACTTTG.  
>Gorilla cacagctctgacgttgggggactgggacccctcttccagctgccgtgttttggcaggaactctgagaatgcttgaactaaaaactggcattttggatctTTATGTAGTGGTATTTCOAAGTAAGAGGAATAGAGCATACTTTATTTAACAACTTTG.  
>Orangutan cacagctctgacgttgggggactgggacccctcttccagctgccgtgttttggcaggaactctgagaatgcttgaactaaaaactggcattttggatctTTATGTAGTGGTATTTCOAAGTAAGAGGAATAGAGCATACTTTATTTAACAACTTTG.  
>Gibbon cacagctctgacgttgggggactgggacccctcttccagctgccgtgttttggcaggaactctgagaatgcttgaactaaaaactggcattttggatctTTATGTAGTGGTATTTCOAAGTAAGAGGAATAGAGCATACTTTATTTAACAACTTTG.  
>Rhesus gctctgacgtctgggagactgggacccctcttccagctgccgtgttttggcaggaactctgagaatgcttgaactaaaaactggcattttggatctTTATGTAGTGGTATTTCOAAGTAAGAGGAATAGAGCATACTTTATTTAACAACTTTGATG

Figure S2. Retrieve similar DNA sequence using BLAT.

## Basic Options

or

**Sequence:**

**Search Engine:** ☒ abblast ☐ rmbblast ☐ hmmer ☐ cross\_match

**Speed/Sensitivity:** ☐ rush ☐ quick ☐ default ☒ slow

**DNA source:**  Human

**Return Format:** ☒ html ☐ tar file

**Return Method:** ☒ html ☐ email  Your email address

## Results

Right-click and select "Save As" to save results to your computer or click on the link to view the file in the browser.

Annotation File: [EM2icqpload5\\_1372728873.out.html](#) (NEW XHTML Format)

[EM2icqpload5\\_1372728873.out.txt](#) (Text File Format)

Masked File: [EM2icqpload5\\_1372728873.masked](#)

Alignment File: [EM2icqpload5\\_1372728873.aln](#)

| SW    | perc | perc | perc | query     | position | in   | query  | matching | repeat       | position       | in  | repeat |         |
|-------|------|------|------|-----------|----------|------|--------|----------|--------------|----------------|-----|--------|---------|
| score | div. | del. | ins. | sequence  | begin    | end  | (left) | repeat   | class/family | begin          | end | (left) | ID      |
| 551   | 26.1 | 8.1  | 3.2  | Chimp     | 17       | 226  | (844)  | +        | MER115       | DNA/hAT-Tip100 | 450 | 669    | (24) 1  |
| 17    | 18.5 | 0.0  | 0.0  | Chimp     | 802      | 832  | (238)  | +        | A-rich       | Low_complexity | 1   | 31     | (0) 2   |
| 17    | 12.1 | 2.4  | 7.0  | Chimp     | 959      | 1000 | (70)   | +        | GA-rich      | Low_complexity | 1   | 43     | (0) 3   |
| 575   | 26.1 | 9.7  | 1.3  | Gibbon    | 32       | 248  | (821)  | +        | MER115       | DNA/hAT-Tip100 | 459 | 693    | (0) 4   |
| 17    | 18.5 | 0.0  | 0.0  | Gibbon    | 801      | 831  | (238)  | +        | A-rich       | Low_complexity | 1   | 31     | (0) 5   |
| 17    | 12.1 | 2.4  | 7.0  | Gibbon    | 958      | 999  | (70)   | +        | GA-rich      | Low_complexity | 1   | 43     | (0) 6   |
| 564   | 27.5 | 8.2  | 2.9  | Gorila    | 17       | 248  | (822)  | +        | MER115       | DNA/hAT-Tip100 | 450 | 693    | (0) 7   |
| 17    | 18.5 | 0.0  | 0.0  | Gorila    | 802      | 832  | (238)  | +        | A-rich       | Low_complexity | 1   | 31     | (0) 8   |
| 15    | 12.8 | 2.5  | 7.3  | Gorila    | 959      | 998  | (72)   | +        | GA-rich      | Low_complexity | 1   | 41     | (0) 9   |
| 542   | 28.4 | 8.2  | 2.9  | Human     | 17       | 248  | (822)  | +        | MER115       | DNA/hAT-Tip100 | 450 | 693    | (0) 10  |
| 17    | 18.5 | 0.0  | 0.0  | Human     | 802      | 832  | (238)  | +        | A-rich       | Low_complexity | 1   | 31     | (0) 11  |
| 15    | 12.8 | 2.5  | 7.3  | Human     | 959      | 998  | (72)   | +        | GA-rich      | Low_complexity | 1   | 41     | (0) 12  |
| 597   | 27.8 | 7.8  | 2.5  | Orangutan | 17       | 248  | (814)  | +        | MER115       | DNA/hAT-Tip100 | 450 | 693    | (0) 13  |
| 17    | 14.6 | 2.3  | 6.7  | Orangutan | 951      | 994  | (68)   | +        | GA-rich      | Low_complexity | 1   | 45     | (0) 14  |
| 609   | 24.2 | 10.2 | 1.4  | Rhesus    | 28       | 232  | (898)  | +        | MER115       | DNA/hAT-Tip100 | 459 | 681    | (12) 15 |

Figure S3. TE identification using RepeatMasker.

Sequence source:

Force translated search: ☐

Search for identity: ☐

Report simple repeats: ☐

Mask pseudogenes: ☐

Enter query file name:  
(Up to 2MB; IC-Stanford, FASTA, GENBANK, EMBL formats are supported)

OR

Paste query sequences here:  
(Up to 2MB; IC-Stanford, FASTA, GENBANK, EMBL formats are supported)

```

cacagctctgacgttgggggactgggcacccctctccagctgccgtgttttggcaggaactctgag
aatgcttgaacttaaaactggcattttggatctTTAtGTAGTGGTATTTCCAAGTAAAGAGGAATAGA
GCATACTTTATTTAAACAACCTTTGATGTCCTGACTTACTACTTTTAAACACTAAGATTTATGTGGGCT
TCCATTGTTACTCTTACCTCAGGCCACAGAtGTCATAGAAGAGCTTGGAAAAAGTTAAATTCTTGGG
GAGAATAGAATAGAATCTAAAAGAGGGTGATTTTGGACTCCAGCATCTCTCAGGTTTCTGTTTACCCA
CCTGCACCTTCTCTTCTGGTTCTGAGaCAGGTGCTTATCTCTTTGGAGATGTGCTGAGGCAGAATCA

```

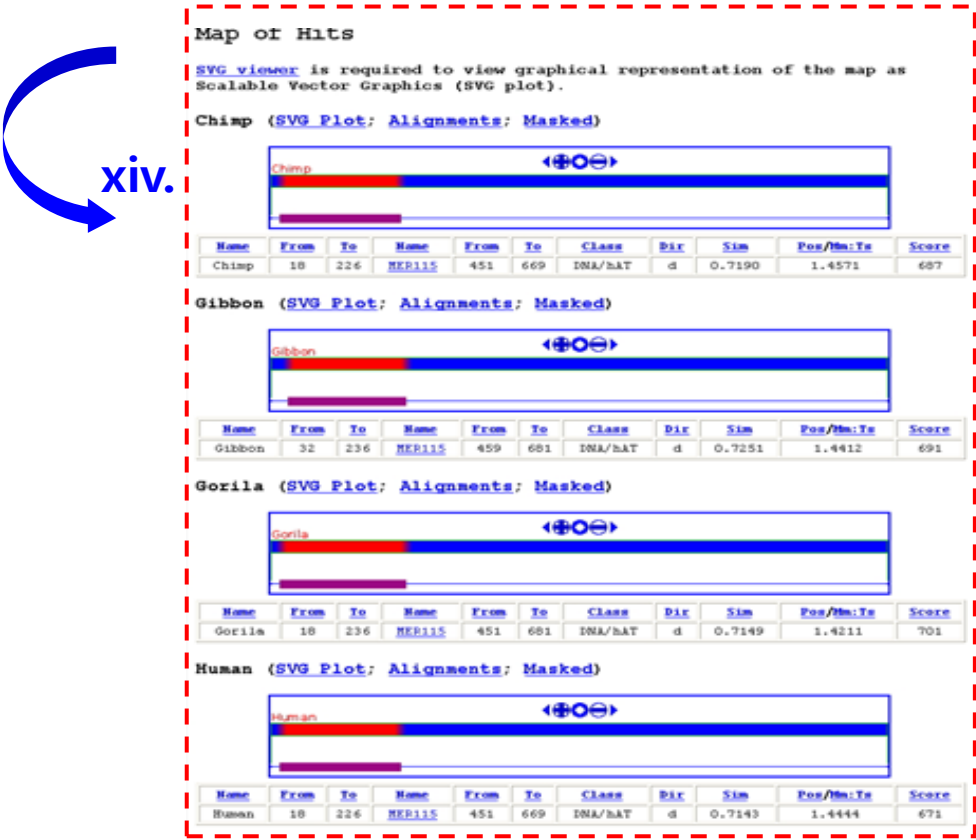

Figure S4. TE identification using Censor
